## 1 UPhyloplot2: Visualizing Phylogenetic Trees from Single-Cell RNA-seq Data

2 Stefan Kurtenbach\*, Daniel A. Rodriguez, Michael A. Durante, and J. William Harbour

3  
4 Bascom Palmer Eye Institute, Sylvester Comprehensive Cancer Center, Interdisciplinary Stem  
5 Cell Institute, University of Miami Miller School of Medicine, Miami, FL, USA.

6 \*Corresponding author

### 8 Abstract

9 Recent advances in single cell sequencing technologies allow for greater resolution in assessing  
10 tumor clonality using chromosome copy number variations (CNVs), which can be inferred from  
11 single cell RNA-seq (scRNA-seq) data using applications such as inferCNV. Inferences regarding  
12 tumor clonality are frequently visualized using phylogenetic plots, which previously required time-  
13 consuming and tedious manual analysis. Here, we present UPhyloplot2, a python script that  
14 generates phylogenetic plots directly from inferCNV output files. The tool is publicly available at  
15 <https://github.com/harbourlab/UPhyloplot2/>.

### 17 Introduction

18 Single cell RNA sequencing (scRNA-seq)  
19 has become an important new tool for  
20 studying gene expression in individual cells  
21 of heterogenous samples. While this  
22 technology is still maturing, it is already  
23 providing powerful new insights into normal  
24 and diseased tissue types [1, 2]. In  
25 particular, single cell technology has  
26 resulted in great strides in cancer research.  
27 A hallmark of cancer is aneuploidy – an  
28 abnormal number of chromosomes or  
29 chromosomal segments – which often  
30 correlates with tumor aggressiveness [3-6].  
31 Further, aneuploidy can be used to identify  
32 subclones of tumor cells and to infer tumor  
33 evolution, which can have important clinical  
34 implications [7]. Single cell sequencing can  
35 be used to analyze subclonal tumor

36 architecture at unprecedented resolution [1, 8]. While single cell DNA sequencing (scDNA-seq)  
37 is an emerging technique for this type of analysis, it is very expensive and yet to be optimized.  
38 Alternatively, CNVs can be inferred from scRNA-seq using applications such as inferCNV [9],  
39 HoneyBadger [10], and CaSpER [11], using gene expression patterns to infer CNVs and to cluster  
40 cells into putative subclones. This approach for studying tumor clonality has been used  
41 successfully by our group and others [8, 12]. Tumor clonality is commonly used to visualize  
42 phylogenetic plots, where the length of tree branches is proportional to the number of cells in each  
43 subclone. Until now, such visualization required time-consuming and error-prone manual  
44 curation. Here we describe a new tool that we have created called UPhyloplot2, which is an

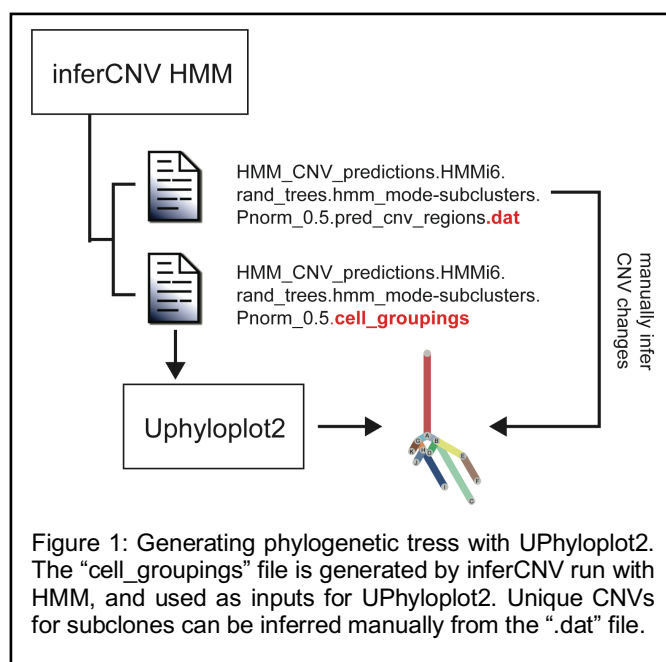

Figure 1: Generating phylogenetic trees with UPhyloplot2. The "cell\_groupings" file is generated by inferCNV run with HMM, and used as inputs for UPhyloplot2. Unique CNVs for subclones can be inferred manually from the ".dat" file.

45 enhanced version of UPhyloplot [13]. This application directly takes inferCNV output files and  
46 generates evolutionary phylogenetic plots.

47

## 48 Results

49 UPhyloplot2 works directly with the output files  
50 of inferCNV, plotting evolutionary trees with the  
51 length of each branch correlating with the  
52 number of cells in the respective subclone.  
53 UPhyloplot2 was written in Python 3, making it  
54 easy to run on any platform (Figure 1).  
55 UPhyloplot2 uses the  
56 “HMM\_CNV\_predictions.\*.cell\_groupings” file  
57 generated by inferCNV (with HMM) to plot.  
58 Multiple “cell\_groupings” files can be processed  
59 at once, to generate one output figure  
60 containing one tree per file. Subsequently,  
61 unique CNVs can be inferred using the  
62 “.HMM\_CNV\_predictions.\*.pred\_cnv\_regions.dat” file. Four “cell\_groupings” file being used as  
63 inputs (Figure 2). Output files are true SVG files, allowing for easy editing (colors, lines, branch  
64 rotation) in programs like Adobe Illustrator or any other SVG editor.

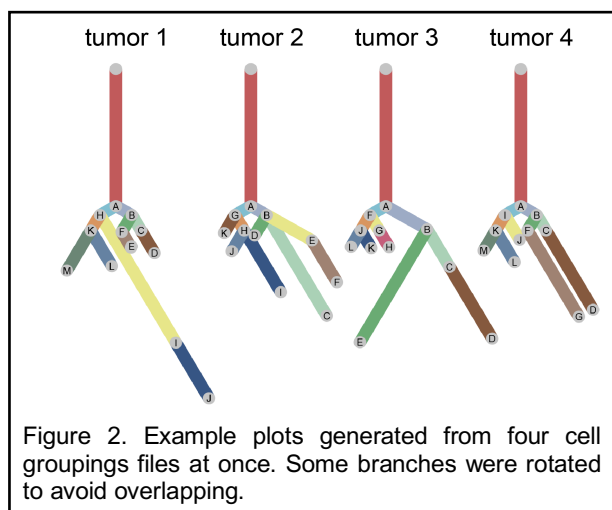

65

## 66 Discussion

67 The python script presented here allows phylogenetic trees of tumor subclones to be plotted from  
68 inferCNV output files. The script and further documentation are publicly available at  
69 <https://github.com/harbourlab/UPhyloplot2/>. In contrast to algorithms that estimate molecular time  
70 from whole-genome sequencing data using the number of mutations [14], the use of CNVs to  
71 infer clonality and tumor evolution is more complex because some chromosomal segments are  
72 selectively altered while others occur through massive genome reorganization such as  
73 chromothripsis [15, 16], chromoplexy [17] and anaphase catastrophe [18]. It is important to note  
74 that our methodology for plotting phylogenetic trees with branch lengths being proportional to the  
75 number of cells does not attempt to depict molecular time, but rather, the proportional size of each  
76 subclone. New methodologies are also being developed for analyzing single cell CNV and single  
77 cell mutation data [19]. In summary, we present an automated tool for generating phylogenetic  
78 trees from scRNA-seq data that allows the visualization of tumor subclones and heterogeneity.

79

## 80 References

- 81 1. Eddy, J. and N. Maizels, *Gene function correlates with potential for G4 DNA formation in*  
82 *the human genome*. Nucleic Acids Res, 2006. **34**(14): p. 3887-96.
- 83 2. Durante, M.A., et al., *Single-cell analysis of olfactory neurogenesis and differentiation in*  
84 *adult humans*. Nat Neurosci, 2020. **23**(3): p. 323-326.
- 85 3. Ben-David, U. and A. Amon, *Context is everything: aneuploidy in cancer*. Nat Rev Genet,  
86 2020. **21**(1): p. 44-62.
- 87 4. Davoli, T., et al., *Tumor aneuploidy correlates with markers of immune evasion and with*  
88 *reduced response to immunotherapy*. Science, 2017. **355**(6322).

- 89 5. Duijf, P.H., N. Schultz, and R. Benezra, *Cancer cells preferentially lose small*  
90 *chromosomes*. *Int J Cancer*, 2013. **132**(10): p. 2316-26.
- 91 6. Ehlers, J.P., et al., *Integrative genomic analysis of aneuploidy in uveal melanoma*. *Clin*  
92 *Cancer Res*, 2008. **14**(1): p. 115-22.
- 93 7. Yates, L.R. and P.J. Campbell, *Evolution of the cancer genome*. *Nat Rev Genet*, 2012.  
94 **13**(11): p. 795-806.
- 95 8. Durante, M.A., et al., *Single-cell analysis reveals new evolutionary complexity in uveal*  
96 *melanoma*. *Nat Commun*, 2020. **11**(1): p. 496.
- 97 9. *inferCNV of the Trinity CTAT Project*.
- 98 10. Fan, J., et al., *Linking transcriptional and genetic tumor heterogeneity through allele*  
99 *analysis of single-cell RNA-seq data*. *Genome Res*, 2018. **28**(8): p. 1217-1227.
- 100 11. Serin Harmanci, A., A.O. Harmanci, and X. Zhou, *CaSpER identifies and visualizes CNV*  
101 *events by integrative analysis of single-cell or bulk RNA-sequencing data*. *Nat Commun*,  
102 2020. **11**(1): p. 89.
- 103 12. Fricke, R., et al., *Checklist of the marine and estuarine fishes of New Ireland Province,*  
104 *Papua New Guinea, western Pacific Ocean, with 810 new records*. *Zootaxa*, 2019.  
105 **4588**(1): p. zootaxa 4588 1 1.
- 106 13. Field, M.G., et al., *Punctuated evolution of canonical genomic aberrations in uveal*  
107 *melanoma*. *Nat Commun*, 2018. **9**(1): p. 116.
- 108 14. Nik-Zainal, S., et al., *The life history of 21 breast cancers*. *Cell*, 2012. **149**(5): p. 994-1007.
- 109 15. Stephens, P.J., et al., *Massive genomic rearrangement acquired in a single catastrophic*  
110 *event during cancer development*. *Cell*, 2011. **144**(1): p. 27-40.
- 111 16. Cortes-Ciriano, I., et al., *Comprehensive analysis of chromothripsis in 2,658 human*  
112 *cancers using whole-genome sequencing*. *Nat Genet*, 2020. **52**(3): p. 331-341.
- 113 17. Baca, S.C., et al., *Punctuated evolution of prostate cancer genomes*. *Cell*, 2013. **153**(3):  
114 p. 666-77.
- 115 18. Galimberti, F., et al., *Anaphase catastrophe is a target for cancer therapy*. *Clin Cancer*  
116 *Res*, 2011. **17**(6): p. 1218-22.
- 117 19. Madipour-Shirayeh, A., et al., *Simultaneous Profiling of DNA Copy Number Variations and*  
118 *Transcriptional Programs in Single Cells using RNA-seq*. *bioRxiv*, 2020: p.  
119 2020.02.10.942607.
- 120
